# Supplementary material for: Type 2 diabetes and HbA1c are independently associated with wider retinal arterioles: the Maastricht study
Source: Springer Nature journal article supplement (doi:10.1007/s00125-020-05146-z), 2020-05-08
Supplement: MOESM1 [file 17964844]

## ESM results

### Additional analyses

Associations remained similar when we replaced office systolic pressure with 24 h ambulatory systolic blood pressure (available in 2545 individuals; ESM Table 2), or further specified blood pressure-lowering medication into renin-angiotensin-aldosterone system (RAAS) inhibitors and other types of antihypertensives (available in 2876 individuals; ESM Table 3) in the regression models. Associations also remained similar when we replaced waist circumference with body mass index (BMI; available in 2875 individuals; ESM Table 3).

Associations again remained similar after additional adjustment for presence of retinopathy, presence of neuropathy, eGFR and albumin excretion, or history of cardiovascular disease (available in 2328 individuals; ESM Table 4). The associations also remained when physical activity and alcohol intake (available in 2535 individuals, ESM Table 5) were added to the models. Additional adjustment for plasma markers of inflammation (CRP, SAA, IL-6, IL-8, and TNF- $\alpha$ ) and their standardised sum score did not materially change the associations (available in 2848 individuals; ESM Table 6).

Associations also remained similar when we excluded participants with outliers (defined as  $<3SD$  or  $>3SD$ ) in retinal microvascular diameters ( $n=18$ ; ESM Table 7), excluded participants with retinopathy ( $n=36$ ; ESM Table 7), excluded participants with catch-up fundus photography ( $n=176$ ; ESM Table 7),

or excluded non-white population ( $n=41$ ; ESM Table 7). Finally, we did not find any significant interactions with sex ( $p$  for interaction  $>0.440$ ) or left versus right eye ( $p$  for interaction  $>0.579$ ) with regard to the associations between glucose metabolism variables on the one hand and retinal outcomes on the other.

ESM tables

**ESM Table 1:** General characteristics of the study population and individuals excluded from the analyses due to missing values

| <b>Characteristic</b>                       | <b>Study population<br/>(N =2876)</b> | <b>Missing</b> | <b>Excluded due to<br/>missing values<br/>(N =534)</b> | <b>p-value</b> |
|---------------------------------------------|---------------------------------------|----------------|--------------------------------------------------------|----------------|
| Age (years)                                 | 59.8 ± 8.2                            | 0              | 59.9 ± 8.6                                             | 0.736          |
| Women (n,%)                                 | 1404 (48.8)                           | 0              | 250 (46.8)                                             | 0.397          |
| Glucose metabolism status (n,%)             |                                       | 0              |                                                        | 0.624          |
| - Normal glucose metabolism                 | 1630 (56.7)                           | 0              | 294 (55.1)                                             |                |
| - Prediabetes                               | 433 (15.1)                            | 0              | 78 (14.6)                                              |                |
| - Type 2 diabetes                           | 813 (28.3)                            | 0              | 162 (30.3)                                             |                |
| Diabetes duration (years) <sup>a</sup>      | 5.0 [1.0-11.0]                        | 177            | 5.0 [1.5-11.0]                                         | 0.601          |
| Body mass index (kg/m <sup>2</sup> )        | 27.1 ± 4.5                            | 3              | 27.4 ± 4.8                                             | 0.166          |
| Waist circumference (cm)                    |                                       | 4              |                                                        |                |
| - Men                                       | 101.5 ± 12.1                          | 2              | 102.2 ± 12.5                                           | 0.340          |
| - Women                                     | 89.9 ± 12.9                           | 2              | 91.0 ± 13.5                                            | 0.234          |
| History of cardiovascular disease (n,%)     | 473 (16.6)                            | 65             | 88 (18.0)                                              | 0.431          |
| Office SBP (mmHg)                           | 134.8 ± 18.0                          | 2              | 136.1 ± 19.2                                           | 0.174          |
| Office DBP (mmHg)                           | 76.2 ± 9.8                            | 2              | 76.0 ± 9.8                                             | 0.678          |
| Ambulatory 24 h SBP (mmHg) <sup>b</sup>     | 119.2 ± 11.5                          | 416            | 119.6 ± 13.1                                           | 0.507          |
| Ambulatory 24 h DBP (mmHg) <sup>b</sup>     | 73.9 ± 7.2                            | 416            | 74.1 ± 7.1                                             | 0.561          |
| Hypertension (n,%)                          | 1613 (56.1)                           | 6              | 302 (56.9)                                             | 0.775          |
| Physical activity (hours/week) <sup>c</sup> | 5.5 ± 4.3                             | 432            | 5.8 ± 4.7                                              | 0.136          |

|                                            |                |     |                |        |
|--------------------------------------------|----------------|-----|----------------|--------|
| Smoking (%never/former/current)            | 35.1/52.0/12.9 | 49  | 31.5/49.9/18.6 | 0.003  |
| Alcohol intake (%none/low/high)            | 18.6/56.2/25.2 | 47  | 19.4/51.3/29.2 | 0.099  |
| Fasting glucose (mmol/l)                   | 6.1 ± 1.6      | 1   | 6.1 ± 1.8      | 0.285  |
| 2 h postload glucose (mmol/l) <sup>d</sup> | 7.9 ± 4.3      | 251 | 7.7 ± 4.0      | 0.168  |
| HbA <sub>1c</sub> (mmol/mol)               | 40.8 ± 9.8     | 13  | 42.5 ± 10.8    | <0.001 |
| HbA <sub>1c</sub> (%)                      | 5.9 ± 0.9      | 13  | 6.0 ± 1.0      | <0.001 |
| Triglycerides (mmol/l)                     | 1.4 ± 0.8      | 4   | 1.5 ± 0.9      | 0.243  |
| Total-to-HDL cholesterol ratio             | 3.6 ± 1.2      | 4   | 4.0 ± 1.2      | <0.001 |
| Total cholesterol (mmol/l)                 | 5.2 ± 1.2      | 4   | 5.2 ± 1.2      | 0.701  |
| HDL cholesterol (mmol/l)                   | 1.5 ± 0.5      | 4   | 1.4 ± 0.4      | <0.001 |
| LDL cholesterol (mmol/l)                   | 3.1 ± 1.0      | 4   | 3.2 ± 1.0      | 0.026  |
| Antihypertensive medication use (n,%)      | 1161 (40.4)    | 0   | 208 (39.0)     | 0.564  |
| Lipid-modifying medication use (n,%)       | 1033 (35.9)    | 0   | 198 (37.1)     | 0.624  |
| Diabetes medication use (n,%)              | 641 (22.3)     | 0   | 125 (23.4)     | 0.573  |
| - Insulin                                  | 167 (5.8)      | 0   | 49 (9.2)       | 0.005  |
| - Oral medication only                     | 600 (20.9)     | 0   | 114 (21.3)     | 0.817  |
| eGFR (ml/min/1.73m <sup>2</sup> )          | 88.2 ± 14.7    | 33  | 87.5 ± 15.9    | 0.314  |
| Albuminuria (n,%) <sup>e</sup>             | 243 (8.5)      | 42  | 48 (9.4)       | 0.732  |
| Retinopathy (n,%)                          | 36 (1.3)       | 587 | 4 (3.0)        | 0.114  |
| Neuropathy (n,%) <sup>f</sup>              | 277 (10.9)     | 470 | 49 (12.2)      | 0.441  |
| CRAE (MU)                                  | 142.3 ± 20.4   | 486 | 136.4 ± 21.5   | 0.045  |
| CRVE (MU)                                  | 214.7 ± 31.3   | 486 | 214.0 ± 33.3   | 0.875  |

Data are reported as mean ± SD or number (percentages %) as appropriate, except diabetes duration, which is reported as median [interquartile range]. Student's t and chi-square tests were used to compare continuous and categorical variables between the study population and individuals excluded due to missing values, respectively. The Mann-Whitney test was used to compare diabetes duration between the two populations. SBP, systolic blood pressure; DBP, diastolic blood pressure; HbA<sub>1c</sub>, hemoglobin A1c; HDL,

high density lipoprotein; LDL, low density lipoprotein; eGFR, estimated glomerular filtration rate; CRAE, central retinal arteriolar equivalent; CRVE, central retinal venular equivalent; MU, measurement unit.

<sup>a</sup> Available in 673 in the study population and 125 in the excluded group

<sup>b</sup> Available in 2545 in the study population and 449 in the excluded group

<sup>c</sup> Available in 2535 in the study population and 443 in the excluded group

<sup>d</sup> Available in 2685 in the study population and 474 in the excluded group

<sup>e</sup> Albuminuria was defined as a urinary albumin excretion of > 30 mg per 24 hours

<sup>f</sup> Neuropathy was defined as a vibration perception threshold >25 V, and data were available in 2539 in the study population and 401 in the excluded group.

**ESM Table 2:** Multivariable-adjusted difference in retinal vascular diameters in individuals with prediabetes and type 2 diabetes versus normal glucose metabolism (NGM) with replacement of office by 24 h systolic ambulatory blood pressure in regression models

| Characteristic | Prediabetes <sup>a</sup><br>( $\beta$ (95% CI)) | Type 2 diabetes <sup>a</sup><br>( $\beta$ (95% CI)) | <i>p</i> for Trend |
|----------------|-------------------------------------------------|-----------------------------------------------------|--------------------|
| CRAE (MU)      |                                                 |                                                     |                    |
| Model 1        | 0.02 (-2.29 to 2.32)                            | 1.67 (-0.21 to 3.55)                                | 0.096              |
| Model 2a       | 0.12 (-2.24 to 2.48)                            | 2.27 (-0.05 to 4.58)                                | 0.069              |
| Model 2b       | 0.03 (-2.33 to 2.38)                            | 2.09 (-0.22 to 4.39)                                | 0.094              |
| CRVE (MU)      |                                                 |                                                     |                    |
| Model 1        | 3.47 (-0.12 to 7.05)                            | 4.43 (1.50 to 7.36)                                 | 0.002              |
| Model 2a       | 2.03 (-1.65 to 5.71)                            | 2.93 (-0.67 to 6.53)                                | 0.099              |
| Model 2b       | 1.98 (-1.69 to 5.66)                            | 2.83 (-0.76 to 6.43)                                | 0.110              |

Regression coefficients ( $\beta$ ) indicate the mean difference (95% CI) in retinal microvascular diameters with normal glucose metabolism as reference. CI: confidence interval. CRAE: Central retinal arteriolar equivalent. CRVE: Central retinal venular equivalent. MU: Measurement unit. <sup>a</sup> 24-h systolic ambulatory blood pressure was available in n=2545 of the study population (375 individuals with prediabetes and 722 individuals with type 2 diabetes).

Model 1 : adjustment for age and sex

Model 2a: Model 1+adjustment for waist circumference, triglyceride levels, total-to-high-density-lipoprotein ratio, smoking status, office systolic blood pressure, use of antihypertensive medication, and use of lipid-modifying medication

Model 2b: Model 1+adjustment for waist circumference, triglyceride levels, total-to-high-density-lipoprotein ratio, smoking status, 24 h systolic ambulatory blood pressure, use of antihypertensive medication, and use of lipid-modifying medication

**ESM Table 3:** Multivariable-adjusted difference in retinal vascular diameters in individuals with prediabetes and type 2 diabetes versus normal glucose metabolism (NGM) with adjustment for renin-angiotensin-aldosterone system (RAAS)-inhibiting antihypertensives and other types of antihypertensives or replacement of waist circumference by body mass index (BMI) in regression models

| Characteristic | Prediabetes<br>( $\beta$ (95% CI)) | Type 2 diabetes<br>( $\beta$ (95% CI)) | <i>p</i> for Trend |
|----------------|------------------------------------|----------------------------------------|--------------------|
| CRAE (MU)      |                                    |                                        |                    |
| Model 1        | 0.42 (-1.73 to 2.57)               | 2.29 (0.52 to 4.06)                    | 0.013              |
| Model 2a       | 0.62 (-1.58 to 2.83)               | 2.89 (0.69 to 5.08)                    | 0.013              |
| Model 2b       | 0.60 (-1.60 to 2.80)               | 2.83 (0.64 to 5.03)                    | 0.014              |
| Model 2c       | 0.64 (-1.57 to 2.84)               | 2.86 (0.67 to 5.06)                    | 0.013              |
| Model 2d       | 0.53 (-1.67 to 2.73)               | 2.69 (0.52 to 4.87)                    | 0.019              |
| CRVE (MU)      |                                    |                                        |                    |
| Model 1        | 3.84 (0.50 to 7.18)                | 4.68 (1.93 to 7.43)                    | 0.001              |
| Model 2a       | 2.40 (-1.03 to 5.84)               | 2.87 (-0.55 to 6.29)                   | 0.083              |
| Model 2b       | 2.37 (-1.06 to 5.80)               | 2.89 (-0.53 to 6.31)                   | 0.081              |
| Model 2c       | 2.38 (-1.06 to 5.82)               | 2.90 (-0.53 to 6.32)                   | 0.080              |
| Model 2d       | 2.39 (-1.04 to 5.82)               | 2.87 (-0.52 to 6.25)                   | 0.080              |

Regression coefficients ( $\beta$ ) indicate the mean difference (95% CI) in retinal microvascular diameters with normal glucose metabolism as reference. CI: confidence interval. CRAE: Central retinal arteriolar equivalent. CRVE: Central retinal venular equivalent. MU: Measurement unit. RAAS-inhibiting antihypertensives included angiotensin-converting-enzyme inhibitors, angiotensin receptor blockers, and renin blockers.

Model 1 : adjustment for age and sex

Model 2a: Model 1+adjustment for waist circumference, triglyceride levels, total-to-high-density-lipoprotein ratio, smoking status, office systolic blood pressure, use of antihypertensive medication, and use of lipid-modifying medication

Model 2b: Model 1+adjustment for waist circumference, triglyceride levels, total-to-high-density-lipoprotein ratio, smoking status, office systolic blood pressure, use of RAAS-inhibiting antihypertensives, and use of lipid-modifying medication

Model 2c: Model 1+adjustment for waist circumference, triglyceride levels, total-to-high-density-lipoprotein ratio, smoking status, office systolic blood pressure, use of RAAS-inhibiting antihypertensives, use of non-RAAS-inhibiting antihypertensives and use of lipid-modifying medication

Model 2d: Model 1+adjustment for BMI, triglyceride levels, total-to-high-density-lipoprotein ratio, smoking status, office systolic blood pressure, use of antihypertensive medication, and use of lipid-modifying medication



**ESM Table 4:** Multivariable-adjusted difference in retinal vascular diameters in individuals with prediabetes and type 2 diabetes versus normal glucose metabolism (NGM) with additional adjustment for presence of retinopathy, presence of neuropathy, estimated glomerular filtration rate (eGFR) and albumin excretion, and history of cardiovascular disease

| Characteristic   | Prediabetes <sup>a</sup> | Type 2 diabetes <sup>a</sup> | <i>p</i> for Trend |
|------------------|--------------------------|------------------------------|--------------------|
|                  | ( $\beta$ (95% CI))      | ( $\beta$ (95% CI))          |                    |
| <b>CRAE (MU)</b> |                          |                              |                    |
| Model 1          | 1.85 (-0.52 to 4.23)     | 1.92 (-0.002 to 3.84)        | 0.040              |
| Model 2a         | 2.16 (-0.26 to 4.59)     | 2.40 (0.05 to 4.76)          | 0.034              |
| Model 2b         | 2.17 (-0.26 to 4.59)     | 2.37 (0.001 to 4.74)         | 0.036              |
| Model 2c         | 2.16 (-0.26 to 4.59)     | 2.31 (-0.07 to 4.69)         | 0.042              |
| Model 2d         | 2.41 (-0.01 to 4.82)     | 2.51 (0.14 to 4.89)          | 0.026              |
| Model 2e         | 2.51 (0.09 to 4.93)      | 2.54 (0.16 to 4.92)          | 0.024              |
| <b>CRVE (MU)</b> |                          |                              |                    |
| Model 1          | 4.41 (0.70 to 8.13)      | 4.80 (1.80 to 7.81)          | 0.001              |
| Model 2a         | 3.31 (-0.49 to 7.11)     | 3.10 (-0.60 to 6.80)         | 0.075              |
| Model 2b         | 3.33 (-0.47 to 7.13)     | 2.89 (-0.83 to 6.61)         | 0.094              |
| Model 2c         | 3.33 (-0.48 to 7.13)     | 2.88 (-0.86 to 6.61)         | 0.096              |
| Model 2d         | 3.75 (-0.05 to 7.54)     | 3.17 (-0.55 to 6.90)         | 0.065              |
| Model 2e         | 3.89 (0.09 to 7.69)      | 3.21 (-0.52 to 6.94)         | 0.061              |

Regression coefficients ( $\beta$ ) indicate the mean difference (95% CI) in retinal microvascular diameters with normal glucose metabolism as reference. CI: confidence interval. CRAE: Central retinal arteriolar equivalent. CRVE: Central retinal venular equivalent. MU: Measurement unit. <sup>a</sup> Data were available in n=2328 of the study population (344 individuals with prediabetes and 683 individuals with type 2 diabetes).

Model 1: adjustment for age and sex

Model 2a: Model 1+adjustment for waist circumference, triglyceride levels, total-to-high-density-lipoprotein ratio, smoking status, office systolic blood pressure, use of antihypertensive medication, and use of lipid-modifying medication

Model 2b: Model 2a+adjustment for retinopathy

Model 2c: Model 2b+adjustment for neuropathy (vibration perception thresholds >25 V)

Model 2d: Model 2c+adjustment for eGFR and albumin excretion

Model 2e: Model 2d+adjustment for history of cardiovascular disease

**ESM Table 5:** Multivariable-adjusted difference in retinal vascular diameters in individuals with prediabetes and type 2 diabetes versus normal glucose metabolism (NGM) with additional adjustment for physical activity and alcohol intake

| Characteristic   | Prediabetes <sup>a</sup> | Type 2 diabetes <sup>a</sup> | p for Trend |
|------------------|--------------------------|------------------------------|-------------|
|                  | ( $\beta$ (95% CI))      | ( $\beta$ (95% CI))          |             |
| <b>CRAE (MU)</b> |                          |                              |             |
| Model 1          | 0.46 (-1.78 to 2.70)     | 1.92 (0.05 to 3.79)          | 0.049       |
| Model 2a         | 0.72 (-1.58 to 3.02)     | 2.63 (0.32 to 4.95)          | 0.030       |
| Model 2b         | 0.71 (-1.59 to 3.01)     | 2.62 (0.30 to 4.94)          | 0.031       |
| Model 2c         | 0.66 (-1.63 to 2.96)     | 2.17 (-0.18 to 4.52)         | 0.076       |
| <b>CRVE (MU)</b> |                          |                              |             |
| Model 1          | 3.94 (0.43 to 7.45)      | 3.39 (0.46 to 6.33)          | 0.014       |
| Model 2a         | 2.53 (-1.08 to 6.15)     | 1.98 (-1.67 to 5.63)         | 0.226       |
| Model 2b         | 2.53 (-1.09 to 6.15)     | 1.99 (-1.67 to 5.64)         | 0.227       |
| Model 2c         | 2.50 (-1.12 to 6.12)     | 1.68 (-2.01 to 5.38)         | 0.293       |

Regression coefficients ( $\beta$ ) indicate the mean difference (95% CI) in retinal microvascular diameters with normal glucose metabolism as reference. CI: confidence interval. CRAE: Central retinal arteriolar equivalent. CRVE: Central retinal venular equivalent. MU: Measurement unit. <sup>a</sup> Data were available in n=2535 of the study population (387 individuals with prediabetes and 685 individuals with type 2 diabetes).

Model 1: adjustment for age and sex

Model 2a: Model 1+adjustment for waist circumference, triglyceride levels, total-to-high-density-lipoprotein ratio, smoking status, office systolic blood pressure, use of antihypertensive medication, and use of lipid-modifying medication

Model 2b: Model 2a+adjustment for physical activity

Model 2c: Model 2b+adjustment for alcohol intake

**ESM Table 6:** Multivariable-adjusted difference in retinal vascular diameters in individuals with prediabetes and type 2 diabetes versus normal glucose metabolism (NGM) with additional adjustment for inflammation

| Characteristic   | Prediabetes <sup>a</sup><br>( $\beta$ (95% CI)) | Type 2 diabetes <sup>a</sup><br>( $\beta$ (95% CI)) | <i>p</i> for Trend |
|------------------|-------------------------------------------------|-----------------------------------------------------|--------------------|
| <b>CRAE (MU)</b> |                                                 |                                                     |                    |
| Model 1          | 0.32 (-1.83 to 2.48)                            | 2.29 (0.51 to 4.07)                                 | 0.014              |
| Model 2a         | 0.55 (-1.66 to 2.76)                            | 2.88 (0.68 to 5.09)                                 | 0.013              |
| Model 2b         | 0.54 (-1.67 to 2.76)                            | 2.87 (0.67 to 5.08)                                 | 0.014              |
| <b>CRVE (MU)</b> |                                                 |                                                     |                    |
| Model 1          | 3.53 (0.19 to 6.87)                             | 4.77 (2.01 to 7.52)                                 | <0.001             |
| Model 2a         | 2.17 (-1.27 to 5.61)                            | 3.01 (-0.42 to 6.44)                                | 0.074              |
| Model 2b         | 2.06 (-1.38 to 5.50)                            | 2.87 (-0.57 to 6.31)                                | 0.089              |

Regression coefficients ( $\beta$ ) indicate the mean difference (95% CI) in retinal microvascular diameters with normal glucose metabolism as reference. CI: confidence interval. CRAE: Central retinal arteriolar equivalent. CRVE: Central retinal venular equivalent. MU: Measurement unit. <sup>a</sup> Inflammation was available in n=2848 of the study population (430 individuals with prediabetes and 803 individuals with type 2 diabetes).

Model 1 : adjustment for age and sex

Model 2a: Model 1+adjustment for waist circumference, triglyceride levels, total-to-high-density-lipoprotein ratio, smoking status, office systolic blood pressure, use of antihypertensive medication, and use of lipid-modifying medication

Model 2b: Model 2+adjustment for sum score of inflammation

**ESM Table 7:** Multivariable-adjusted difference in retinal vascular diameters in individuals with prediabetes and type 2 diabetes versus normal glucose metabolism (NGM) excluding outliers in retinal microvascular diameters, participants with retinopathy, participants with catch-up fundus photography, or non-white population

| <b>Characteristic</b>                                                                               | <b>Prediabetes<br/>(<math>\beta</math> (95% CI))</b> | <b>Type 2 diabetes<br/>(<math>\beta</math> (95% CI))</b> | <b><i>p</i> for Trend</b> |
|-----------------------------------------------------------------------------------------------------|------------------------------------------------------|----------------------------------------------------------|---------------------------|
| <i>Excluding outliers (defined as &lt;3SD or &gt;3SD) in retinal microvascular diameters (n=18)</i> |                                                      |                                                          |                           |
| <b>CRAE (MU)</b>                                                                                    |                                                      |                                                          |                           |
| Model 1                                                                                             | 0.74 (-1.37 to 2.84)                                 | 2.50 (0.77 to 4.24)                                      | 0.005                     |
| Model 2                                                                                             | 0.87 (-1.29 to 3.03)                                 | 3.00 (0.84 to 5.15)                                      | 0.008                     |
| <b>CRVE (MU)</b>                                                                                    |                                                      |                                                          |                           |
| Model 1                                                                                             | 3.89 (0.60 to 7.18)                                  | 4.99 (2.28 to 7.71)                                      | <0.001                    |
| Model 2                                                                                             | 2.47 (-0.91 to 5.86)                                 | 3.28 (-0.09 to 6.66)                                     | 0.046                     |
| <i>Excluding participants with retinopathy (n=36)</i>                                               |                                                      |                                                          |                           |
| <b>CRAE (MU)</b>                                                                                    |                                                      |                                                          |                           |
| Model 1                                                                                             | 0.41 (-1.75 to 2.56)                                 | 2.27 (0.47 to 4.06)                                      | 0.016                     |
| Model 2                                                                                             | 0.59 (-1.62 to 2.80)                                 | 2.80 (0.58 to 5.02)                                      | 0.017                     |
| <b>CRVE (MU)</b>                                                                                    |                                                      |                                                          |                           |
| Model 1                                                                                             | 3.77 (0.42 to 7.11)                                  | 4.43 (1.65 to 7.22)                                      | 0.001                     |
| Model 2                                                                                             | 2.28 (-1.16 to 5.72)                                 | 2.53 (-0.93 to 5.98)                                     | 0.125                     |
| <i>Excluding participants with catch-up fundus photography (n=176)</i>                              |                                                      |                                                          |                           |
| <b>CRAE (MU)</b>                                                                                    |                                                      |                                                          |                           |
| Model 1                                                                                             | 0.56 (-1.65 to 2.77)                                 | 2.41 (0.61 to 4.22)                                      | 0.010                     |
| Model 2                                                                                             | 0.78 (-1.49 to 3.04)                                 | 3.04 (0.81 to 5.27)                                      | 0.009                     |
| <b>CRVE (MU)</b>                                                                                    |                                                      |                                                          |                           |
| Model 1                                                                                             | 3.67 (0.22 to 7.13)                                  | 4.80 (1.98 to 7.62)                                      | 0.001                     |
| Model 2                                                                                             | 2.26 (-1.29 to 5.82)                                 | 2.99 (-0.52 to 6.49)                                     | 0.082                     |

*Excluding non-white population (n=41)*

| CRAE (MU) |                      | CRVE (MU)            |       |
|-----------|----------------------|----------------------|-------|
| Model 1   | 0.43 (-1.73 to 2.59) | 2.24 (0.45 to 4.03)  | 0.017 |
| Model 2   | 0.65 (-1.57 to 2.86) | 2.91 (0.69 to 5.13)  | 0.013 |
| Model 1   | 3.74 (0.39 to 7.10)  | 4.32 (1.54 to 7.10)  | 0.001 |
| Model 2   | 2.39 (-1.06 to 5.84) | 2.62 (-0.84 to 6.08) | 0.112 |

Regression coefficients ( $\beta$ ) indicate the mean difference (95% CI) in retinal microvascular diameters with normal glucose metabolism as reference. CI: confidence interval. CRAE: Central retinal arteriolar equivalent. CRVE: Central retinal venular equivalent. MU: Measurement unit.

Model 1 : adjustment for age and sex

Model 2: additional adjustment for waist circumference, triglyceride levels, total-to-high-density-lipoprotein ratio, smoking status, office systolic blood pressure, use of antihypertensive medication, and use of lipid-modifying medication

**ESM Table 8: Multivariable-adjusted association between duration of type 2 diabetes and retinal microvascular diameters**

| Characteristic | Duration of type 2 diabetes                 |                                             | <i>p</i> for trend |
|----------------|---------------------------------------------|---------------------------------------------|--------------------|
|                | 2 <sup>nd</sup> tertile<br>$\beta$ (95% CI) | 3 <sup>rd</sup> tertile<br>$\beta$ (95% CI) |                    |
| CRAE (MU)      |                                             |                                             |                    |
| Model 1        | -1.59 (-5.11 to 1.93)                       | 0.09 (-3.43 to 3.61)                        | 0.711              |
| Model 2        | -0.95 (-4.53 to 2.62)                       | 1.43 (-2.20 to 5.06)                        | 0.315              |
| CRVE (MU)      |                                             |                                             |                    |
| Model 1        | -3.60 (-9.08 to 1.88)                       | -4.01 (-9.50 to 1.47)                       | 0.441              |
| Model 2        | -2.48 (-7.99 to 3.02)                       | -2.09 (-7.69 to 3.51)                       | 0.868              |

Regression coefficients ( $\beta$ ) indicate the mean difference (95% CI) in retinal microvascular diameters with the lowest tertile as reference. CI: confidence interval. CRAE: Central retinal arteriolar equivalent. CRVE: Central retinal venular equivalent. MU: Measurement unit. Data were available in 673 individuals.

Model 1: adjustment for age and sex

Model 2: Model 1+adjustment for waist circumference, triglyceride levels, total-to-high-density-lipoprotein ratio, smoking status, office systolic blood pressure, use of antihypertensive medication, and use of lipid-modifying medication

ESM figures

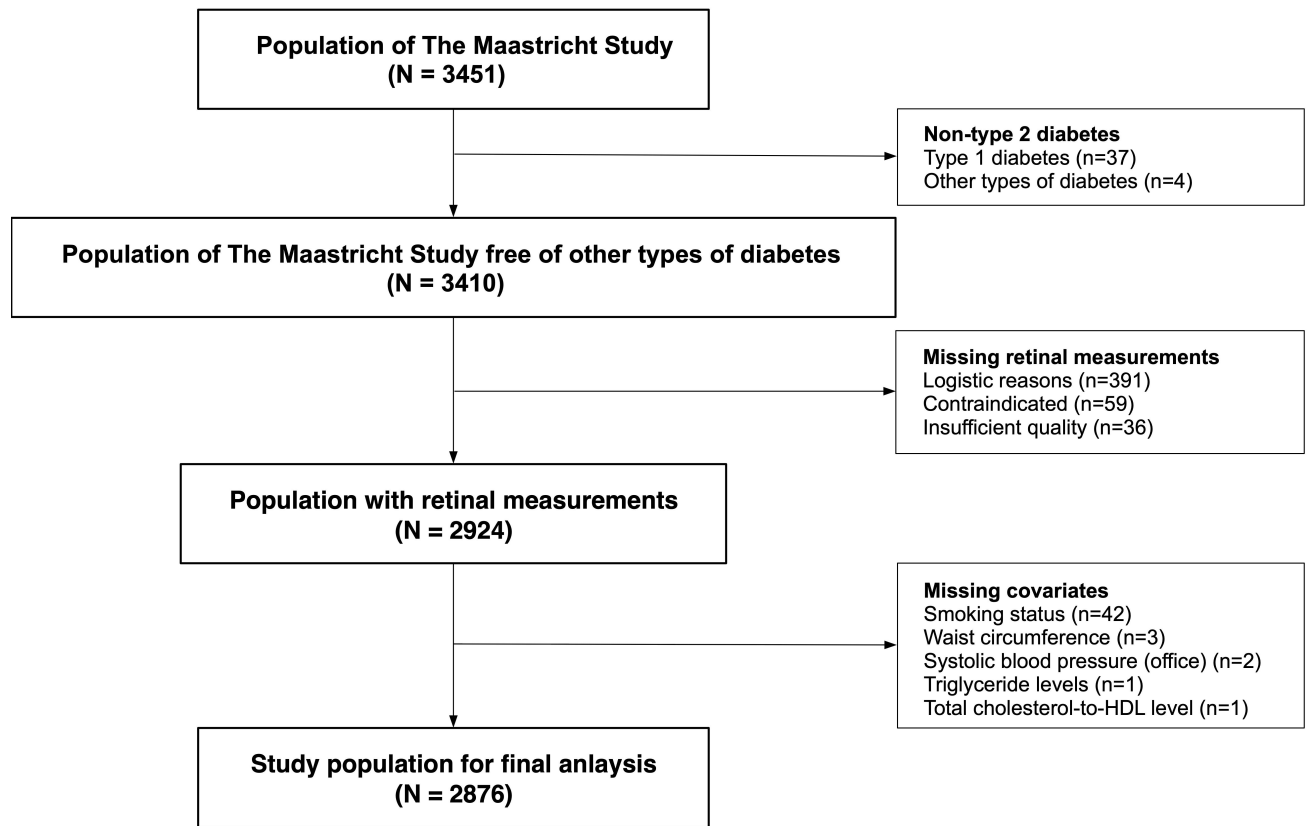

ESM Figure 1. Study population selection



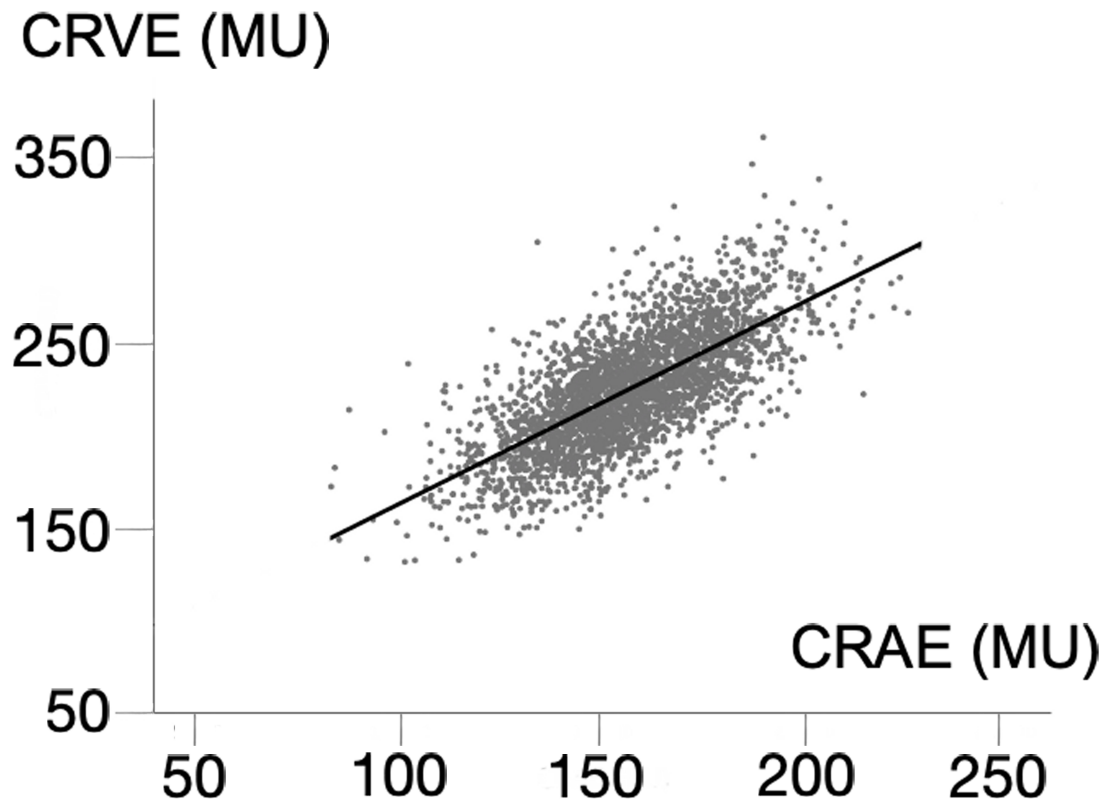

ESM Figure 2. Age- and sex-adjusted association between retinal arteriolar diameters and retinal venular diameters. CRAE, central retinal arteriolar equivalent; CRVE, central retinal venular equivalent; MU, measurement unit;
